# Supplementary material
Source: PubMed Central journal article supplement (PMC4231535)

**Supplemental Digital Content 1: Identification of study population.** The flow diagram shows the number of included and excluded patients.

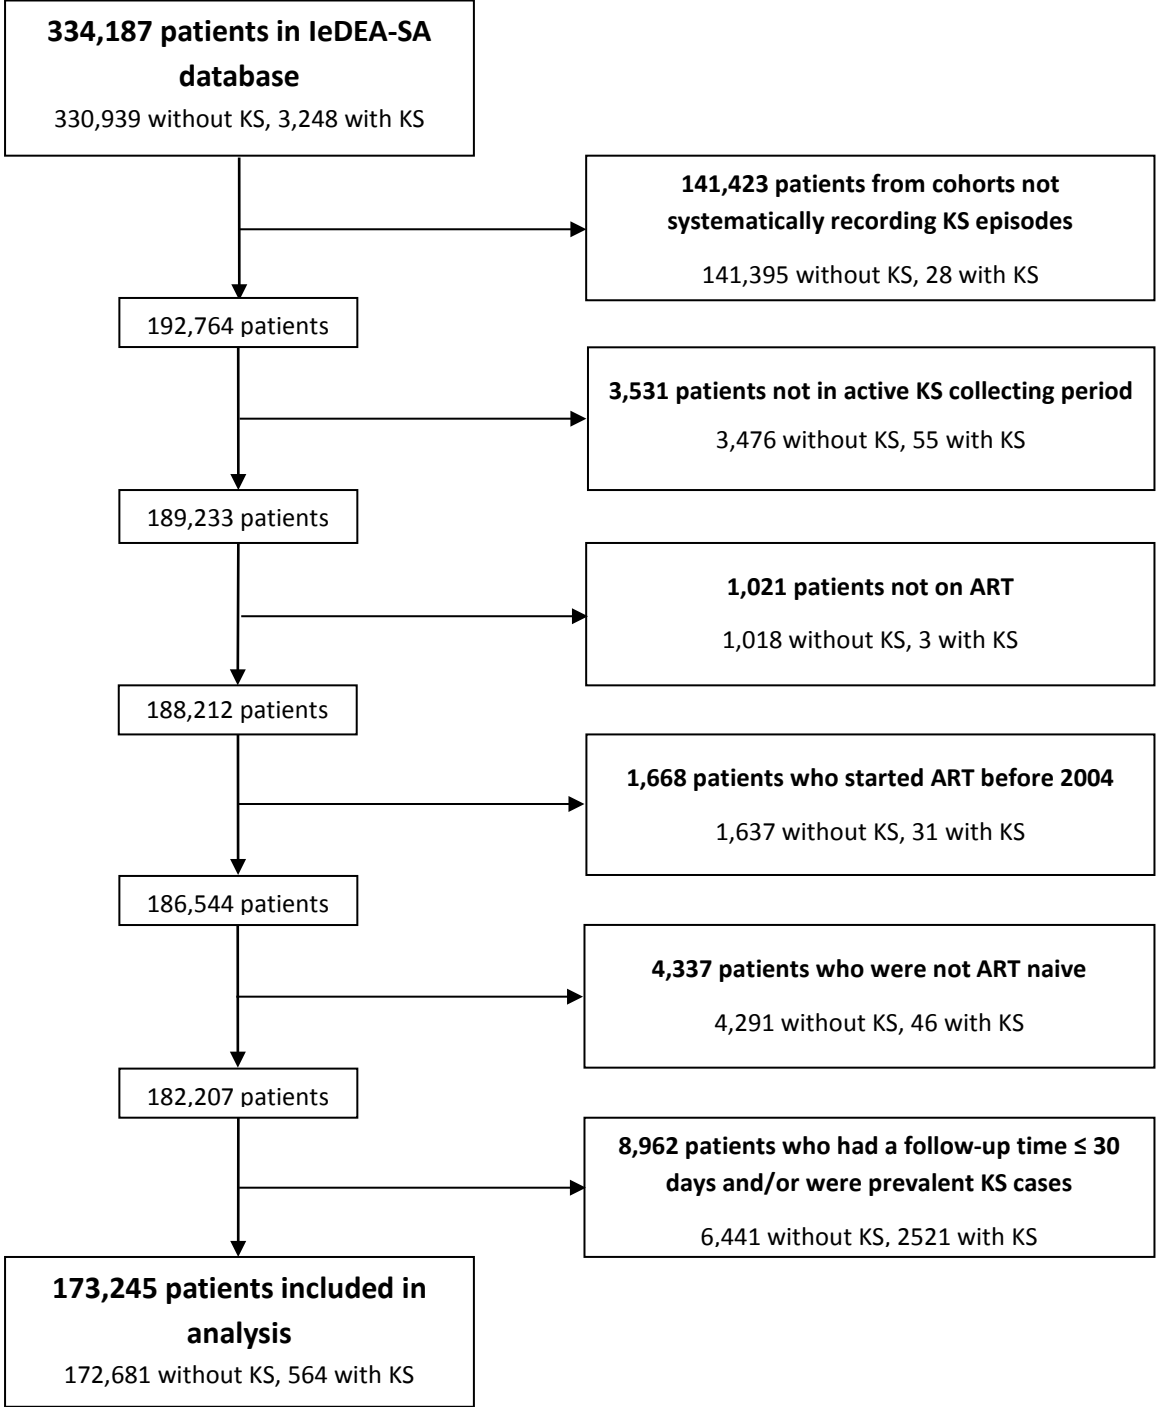

Supplement: NIHMS627522-supplement-Supplemental_Digital_Content.pdf [file NIHMS627522-supplement-Supplemental_Digital_Content.pdf]
